# Supplementary material for: Exploratory Analysis of Objective Outcome Measures for the Clinical Assessment of Erosive Tooth Wear
Source: MDPI journal article supplement (doi:10.3390/diagnostics13152568), 2023-08-02
Supplement: s1 [file s1]

## SUPPLEMENTARY MATERIAL

**Table S1.** Erosive tooth wear (ETW) outcomes (mean and standard deviation) for baseline and 12 months in control subjects.

| ETW Outcomes                   | Baseline       | 12 months       |
|--------------------------------|----------------|-----------------|
| Asfc (complexity) <sup>a</sup> | 0.94 (0.43)    | 0.64 (0.60)     |
| Sa (roughness) <sup>b</sup>    | 124.43 (49.68) | 360.23 (277.84) |
| Str (anisotropy) <sup>c</sup>  | 0.45 (0.15)    | 1.81 (1.13)     |
| Enamel Thickness <sup>d</sup>  | 945 (202)      | 1040 (269)      |
| BEWE <sub>Buccal</sub>         | 0.92 (0.80)    | 1.19 (0.39)     |
| BEWE <sub>Occlusal</sub>       | 0.29 (0.61)    | 1.25 (0.45)     |
| BEWE <sub>Lingual</sub>        | 0.35 (0.53)    | 1.17 (0.38)     |
| BEWE <sub>Max</sub>            | 0.93 (0.80)    | 1.30 (0.46)     |

a: Asfc – area scale fractal complexity (no unit); b: Sa (nm); c: Str – texture aspect ratio (no unit); d: Enamel thickness (μm)
